# Supplementary material for: Atmospheric fates of SO2 at the gas–solid interface of iron oxyhydroxide (FeOOH) minerals: effects of crystal structure, oxalate coating and light irradiance
Source: Royal Society of Chemistry journal article supplement (doi:10.1039/d2en00874b), 2022-11-19
Supplement: d2en00874b1.pdf [file d2en00874b1.pdf]

## ***Supplementary Information:***

### **Atmospheric fates of SO<sub>2</sub> at the gas-solid interface of iron oxyhydroxide (FeOOH) minerals: effects of crystal structure, oxalate coating and light irradiance**

Wei Wang,<sup>a</sup> Kejian Li,<sup>a</sup> Yangyang Liu,<sup>a</sup> Kedong Gong,<sup>a</sup> Qiuyue Ge,<sup>a</sup> Longqian Wang,<sup>a</sup> Tao Wang,<sup>\*a</sup>  
Liwu Zhang<sup>\*ab</sup>

<sup>a</sup> Shanghai Key Laboratory of Atmospheric Particle Pollution and Prevention, Department of Environmental Science and Engineering, Fudan University, Shanghai 200433, People's Republic of China

<sup>b</sup> Shanghai Institute of Pollution Control and Ecological Security, Shanghai 200092, People's Republic of China

\*Corresponding authors

Email: [wangtao\\_fd@fudan.edu.cn](mailto:wangtao_fd@fudan.edu.cn), [zhanglw@fudan.edu.cn](mailto:zhanglw@fudan.edu.cn)

**Table S1.** Parameters for uptake coefficient calculation

| Parameter (unit)                                                        | Value                  |
|-------------------------------------------------------------------------|------------------------|
| Sulfate formation rate: $d[\text{SO}_4^{2-}]/dt$ (ion $\text{s}^{-1}$ ) | According to reactions |
| $A_{\text{BET}}$ ( $\text{m}^2 \text{g}^{-1}$ )                         | Shown in Table 1       |
| $A_{\text{geo}}$ ( $\text{m}^2$ )                                       | $1.96 \times 10^{-5}$  |
| Reactant concentration: $C_{\text{SO}_2}$ (molecule $\text{m}^{-3}$ )   | $1.96 \times 10^{20}$  |
| Gas constant: $R$ ( $\text{J mol}^{-1} \text{K}^{-1}$ )                 | 8.314                  |
| Temperature: $T$ (K)                                                    | 298                    |
| Molar mass: $M_{\text{SO}_2}$ ( $\text{Kg mol}^{-1}$ )                  | $6.4 \times 10^{-2}$   |
| $\pi$                                                                   | 3.14                   |

**Table S2.** Assignment of vibrational frequencies of adsorbed surface sulfur-containing products upon exposure of SO<sub>2</sub> on Fe (oxyhydr)oxides nanoparticles.

| Surface Species Description | Vibrational Mode                            | Assignment Frequency <sup>a</sup> (cm <sup>-1</sup> ) | Refs |
|-----------------------------|---------------------------------------------|-------------------------------------------------------|------|
| Sulfate                     | Symmetric stretching vibration modes of S=O | 1270                                                  | 1    |
| Bidentate Sulfate           | $\nu_3$ symmetric modes                     | 1190, 1158, 1097                                      | 1-3  |
| Bridging (bi)sulfate        |                                             | 1050, 1010                                            | 4    |
| Chemisorbed (bi)sulfite     | $\nu_1$ and $\nu_3$ modes of sulfite        | 971, 923, 886                                         | 5    |

<sup>a</sup>These frequencies of IR bands of sulfur-containing species refer to the frequencies of observed surface product in this work, which are close to the frequencies documented by early literature.

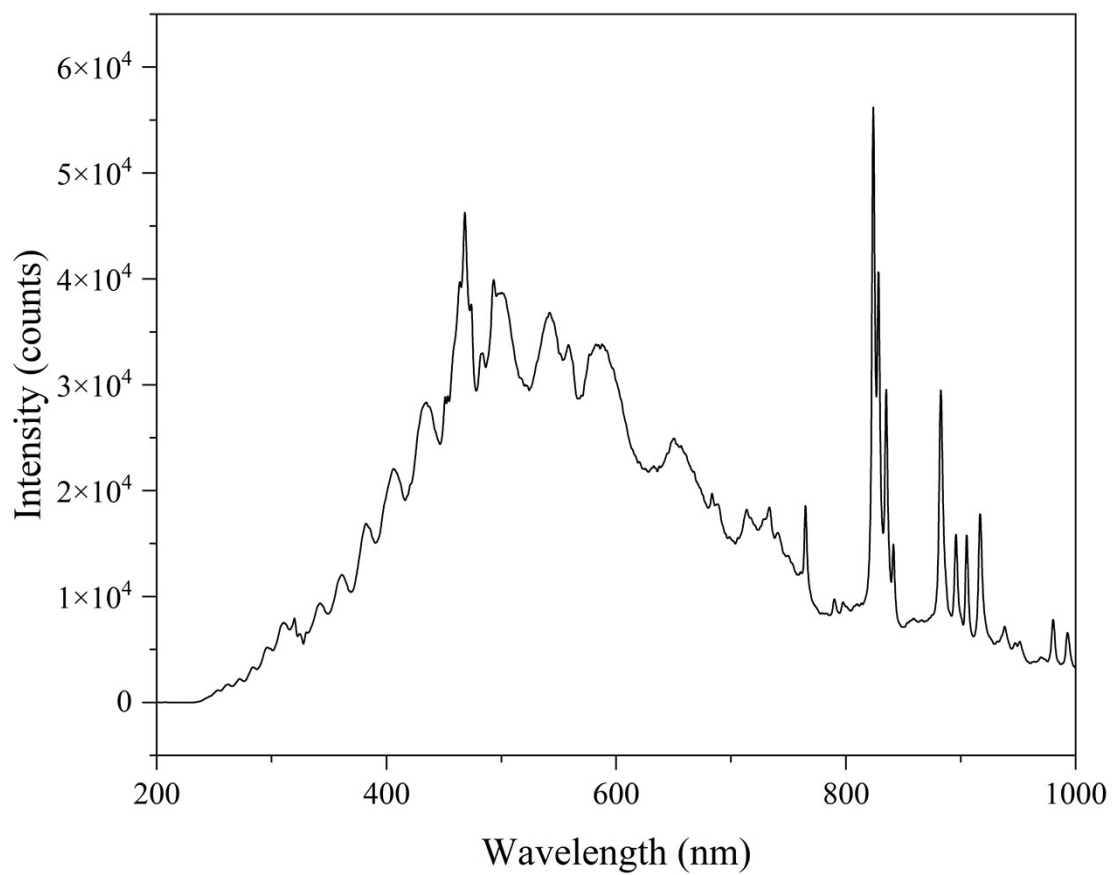

**Fig. S1.** The spectrum of the xenon lamp (TCX250).

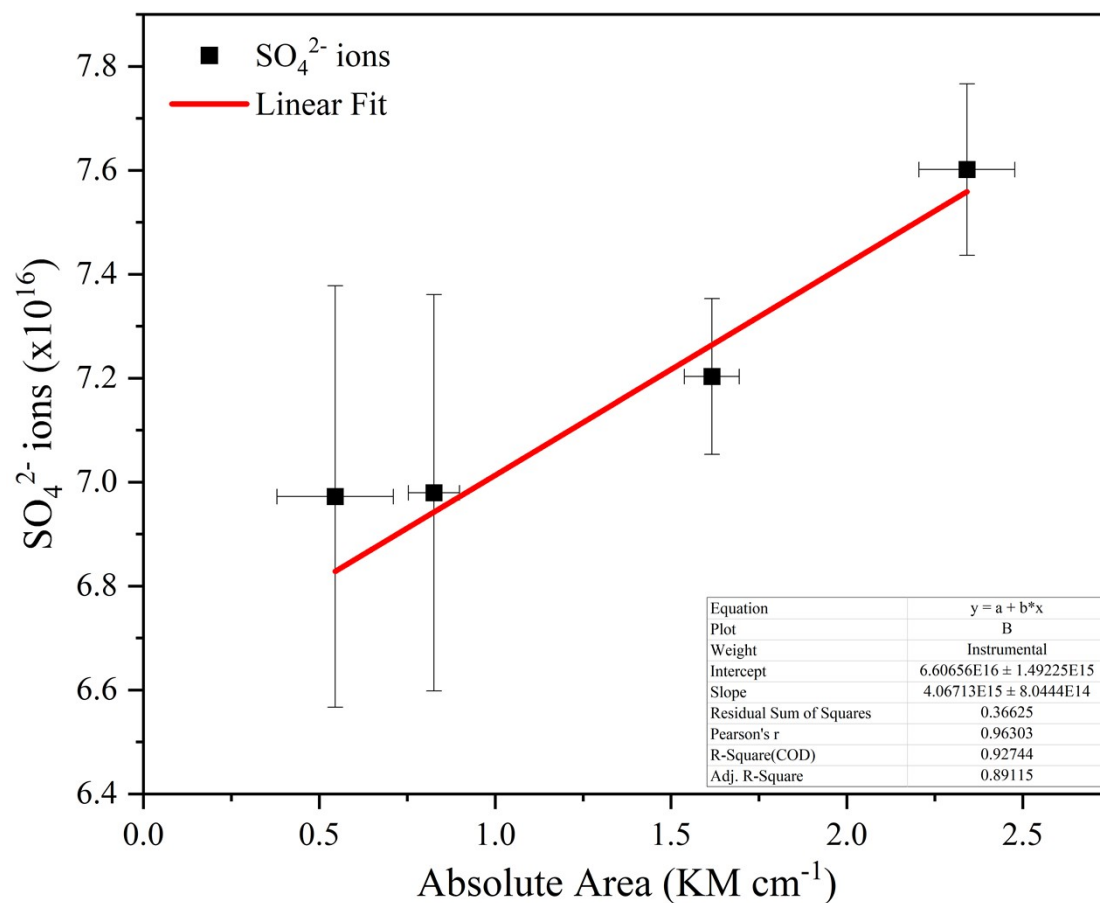

**Fig. S2.** Calibration plot for Conversion-factor of molecules of  $\text{SO}_4^{2-}$  used in  $\alpha$ -FeOOH infrared experiments versus corresponding integrated area of KM.

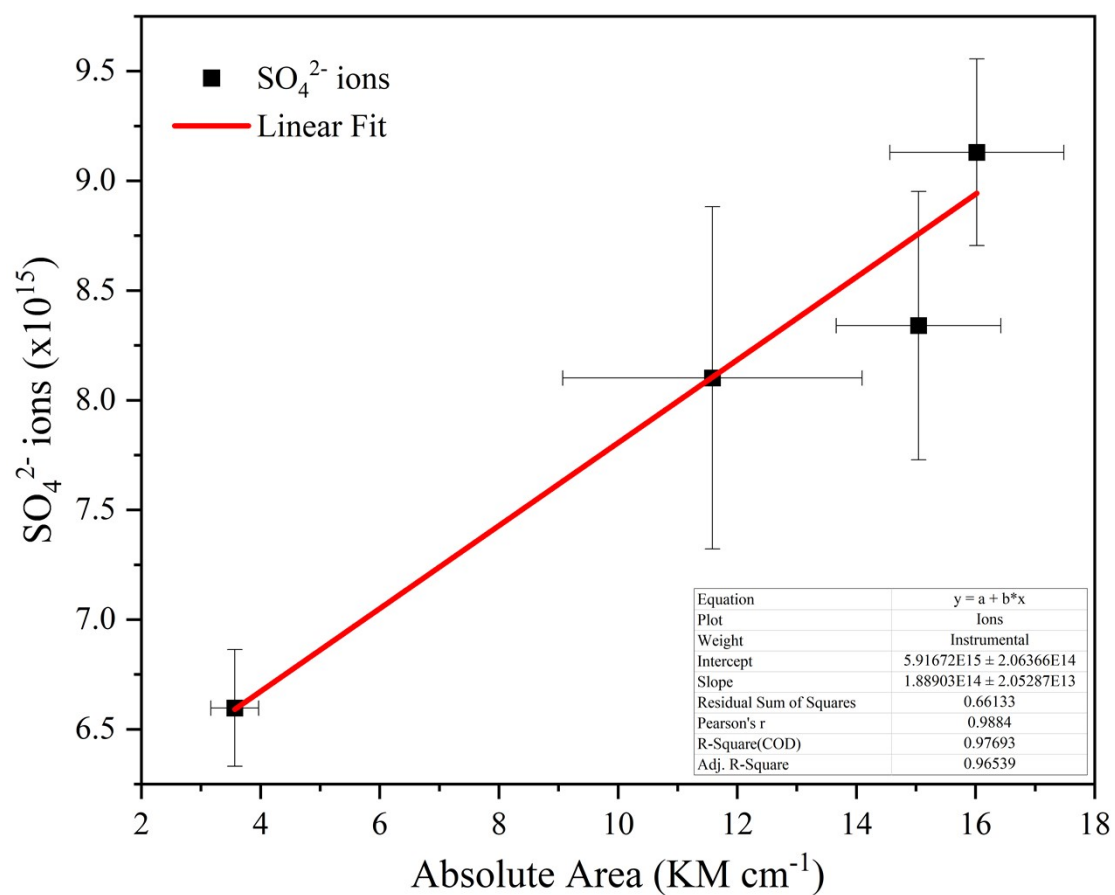

**Fig. S3.** Calibration plot for Conversion-factor of molecules of  $\text{SO}_4^{2-}$  used in  $\beta\text{-FeOOH}$  infrared experiments versus corresponding integrated area of KM.

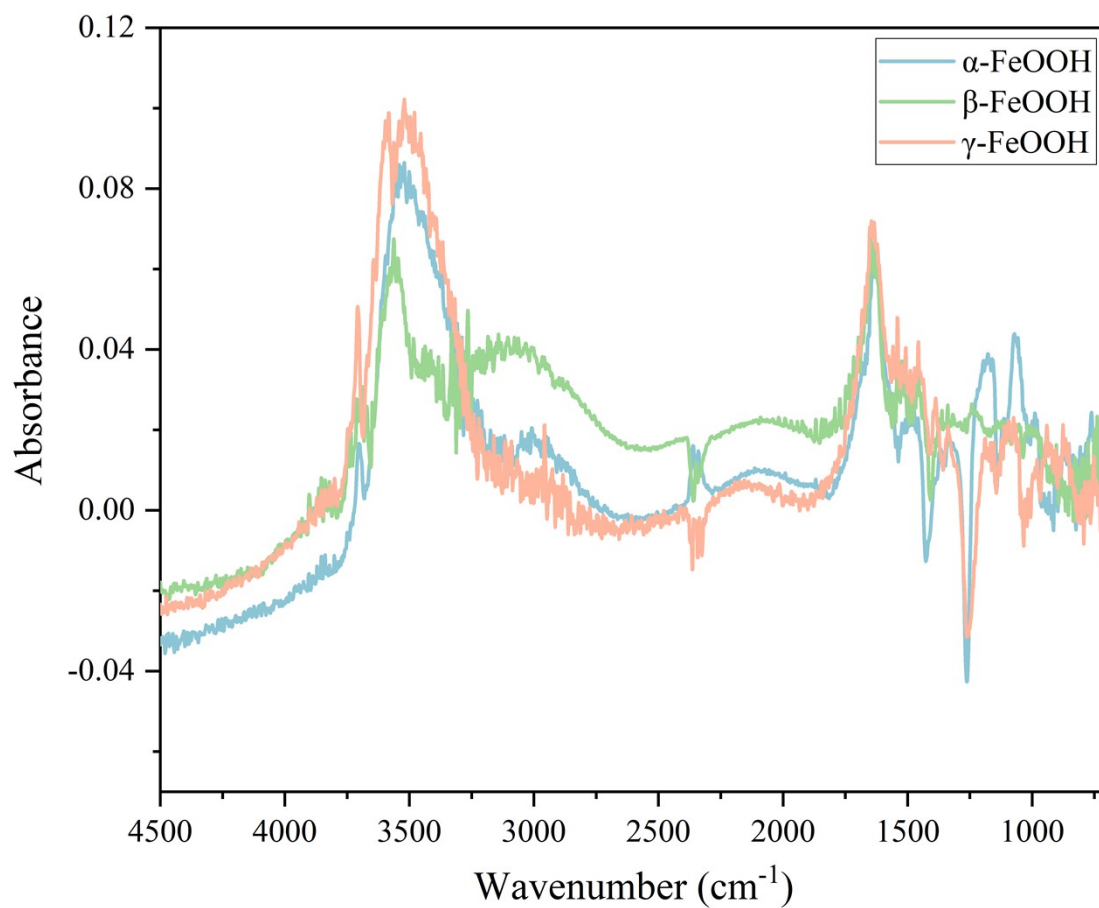

**Fig. S4.** Raw in situ DRIFTS spectra ( $4500\text{-}700\text{ cm}^{-1}$ ) collected for the three pristine samples at 60 min under dark condition.

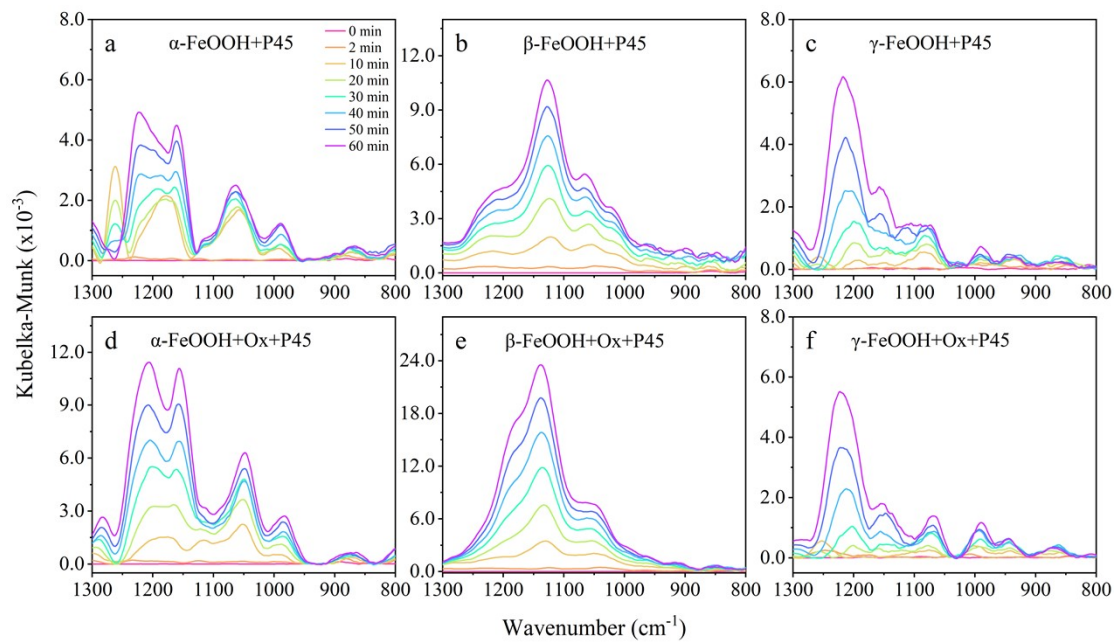

**Fig. S5.** In situ DRIFTS spectra collected for the three (a, b, c) pristine and (d, e, f) oxalate-coating samples under light irradiation (P45): (a, d),  $\alpha\text{-FeOOH}$ . (b, e),  $\beta\text{-FeOOH}$ . (c, f),  $\gamma\text{-FeOOH}$ .



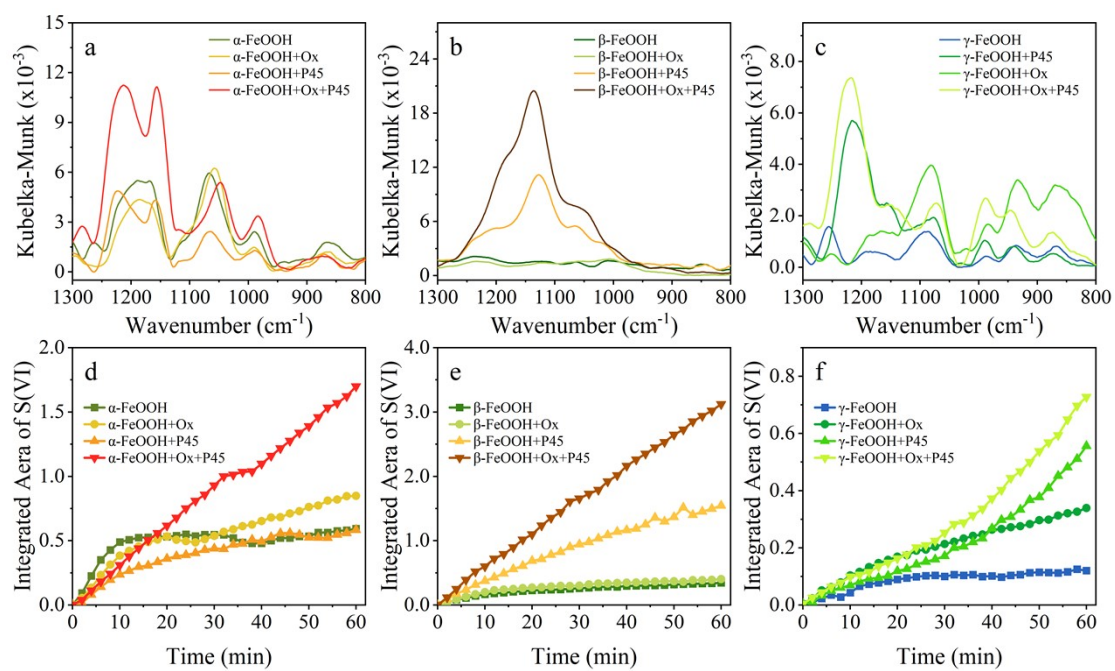

**Fig. S6.** In situ DRIFTS spectra of  $\alpha$ -FeOOH (a),  $\beta$ -FeOOH (b) and  $\gamma$ -FeOOH (c) at 60 min under different conditions and the corresponding integrated areas of sulfate for  $\alpha$ -FeOOH (d),  $\beta$ -FeOOH (e) and  $\gamma$ -FeOOH (f) within 60 min.

## References

1. L. D. Kong, X. Zhao, Z. Y. Sun, Y. W. Yang, H. B. Fu, S. C. Zhang, T. T. Cheng, X. Yang, L. Wang and J. M. Chen, The effects of nitrate on the heterogeneous uptake of sulfur dioxide on hematite, *Atmospheric Chemistry and Physics*, 2014, **14**, 9451-9467.
2. H. Fu, X. Wang, H. Wu, Y. Yin and J. Chen, Heterogeneous Uptake and Oxidation of SO<sub>2</sub> on Iron Oxides, *The Journal of Physical Chemistry C*, 2007, **111**, 6077-6085.
3. C. Liu, Q. Ma, Y. Liu, J. Ma and H. He, Synergistic reaction between SO<sub>2</sub> and NO<sub>2</sub> on mineraloxides: a potential formation pathway of sulfate aerosol, *Phys. Chem. Chem. Phys.*, 2012, **14**, 1668-1676.
4. K. Li, L. Kong, A. Zhanzakova, S. Tong, J. Shen, T. Wang, L. Chen, Q. Li, H. Fu and L. Zhang, Heterogeneous conversion of SO<sub>2</sub> on nano  $\alpha$ -Fe<sub>2</sub>O<sub>3</sub>: the effects of morphology, light illumination and relative humidity, *Environmental Science: Nano*, 2019, **6**, 1838-1851.
5. C. E. Nanayakkara, J. Pettibone and V. H. Grassian, Sulfur dioxide adsorption and photooxidation on isotopically-labeled titanium dioxide nanoparticle surfaces: roles of surface hydroxyl groups and adsorbed water in the formation and stability of adsorbed sulfite and sulfate, *Physical Chemistry Chemical Physics*, 2012, **14**, 6957.
